# Supplementary material for: Blue Light and Temperature Actigraphy Measures Predicting Metabolic Health Are Linked to Melatonin Receptor Polymorphism
Source: MDPI journal article supplement (doi:10.3390/biology13010022), 2023-12-30
Supplement: s1 [file s1]

**Table S1.** Reference values for blue light exposure (BLE) per time epoch, used to calculate Nocturnal Excess Index (grey shaded) and Daylight Deficiency Index (yellow shaded). Note that device measures BLE in Micro-watt/cm<sup>2</sup>. <https://www.unitsconverters.com> was used to relate Micro-watt/cm<sup>2</sup> to Lux. Daylight maximum was set at 500 lux (taken that 250 lux at the eye \* 2, considering approximate 2-fold difference between retina and desk table as actimeter is place on hand). References are from back-log transformation of raw references. Gray area references, though not yellow area references, are from cosine approximation of log<sub>10</sub>.

| Time Epoch Start | Microwatt/cm <sup>2</sup> | Lux     | Raw Reference, Lux |
|------------------|---------------------------|---------|--------------------|
| 00:00            | 0.032                     | 0.217   | 0.250              |
| 00:30            | 0.029                     | 0.201   | 0.000              |
| 01:00            | 0.029                     | 0.200   | 0.000              |
| 01:30            | 0.031                     | 0.212   | 0.000              |
| 02:00            | 0.035                     | 0.241   | 0.000              |
| 02:30            | 0.043                     | 0.293   | 0.000              |
| 03:00            | 0.055                     | 0.377   | 0.000              |
| 03:30            | 0.075                     | 0.514   | 0.000              |
| 04:00            | 0.108                     | 0.738   | 0.000              |
| 04:30            | 0.162                     | 1.110   | 0.000              |
| 05:00            | 0.254                     | 1.734   | 3.000              |
| 05:30            | 0.409                     | 2.793   | 10.000             |
| 06:00            | 0.674                     | 4.603   | 30.000             |
| 06:30            | 1.126                     | 7.693   | 55.000             |
| 07:00            | 1.893                     | 12.929  | 100.000            |
| 07:30            | 3.170                     | 21.650  | 145.000            |
| 08:00            | 5.243                     | 35.808  | 190.000            |
| 08:30            | 8.492                     | 57.998  | 235.000            |
| 09:00            | 13.358                    | 91.235  | 280.000            |
| 09:30            | 20.251                    | 138.312 | 324.000            |
| 10:00            | 29.376                    | 200.641 | 368.000            |
| 10:30            | 40.518                    | 276.739 | 412.000            |
| 11:00            | 52.845                    | 360.928 | 456.000            |
| 11:30            | 64.875                    | 443.099 | 500.000            |
| 12:00            | 74.708                    | 510.259 | 500.000            |
| 12:30            | 80.503                    | 549.833 | 500.000            |
| 13:00            | 81.070                    | 553.708 | 500.000            |
| 13:30            | 76.289                    | 521.052 | 500.000            |
| 14:00            | 67.151                    | 458.639 | 456.000            |
| 14:30            | 55.412                    | 378.461 | 412.000            |
| 15:00            | 43.005                    | 293.725 | 368.000            |
| 15:30            | 31.529                    | 215.343 | 324.000            |
| 16:00            | 21.951                    | 149.927 | 280.000            |
| 16:30            | 14.604                    | 99.745  | 235.000            |
| 17:00            | 9.349                     | 63.854  | 190.000            |
| 17:30            | 5.803                     | 39.636  | 145.000            |
| 18:00            | 3.521                     | 24.051  | 100.000            |
| 18:30            | 2.107                     | 14.389  | 55.000             |
| 19:00            | 1.254                     | 8.563   | 27.500             |
| 19:30            | 0.749                     | 5.113   | 10.000             |
| 20:00            | 0.453                     | 3.091   | 10.000             |
| 20:30            | 0.279                     | 1.909   | 8.500              |
| 21:00            | 0.178                     | 1.213   | 7.000              |
| 21:30            | 0.117                     | 0.800   | 5.500              |

|       |       |       |       |
|-------|-------|-------|-------|
| 22:00 | 0.081 | 0.552 | 4.000 |
| 22:30 | 0.059 | 0.400 | 2.500 |
| 23:00 | 0.045 | 0.307 | 1.000 |
| 23:30 | 0.037 | 0.250 | 0.500 |

Comments for Supplemental Table 1.

20:00-5:00. The phase from the moment after which the melanopic effect should be minimized (less than the threshold of 10 lux — at least 3 hours before the expected bedtime [7], 21 hours is the average value for DLMO (Dim Light Melatonin Onset). In at least 1 hour, it is optimal to reduce the level of melanopic light exposure to the intensity of melanopic light exposure that does not interfere with the production of endogenous melatonin. During the entire sleep period, the exposure of melanopic light exposure should not exceed 1 lux at eye level [7], however, taking into account the pronounced individual sensitivity characteristics [83], zero reference values are recommended during 5 hours of basic sleep (00:00-5:00) sleep.

Upon awakening, blue light stimulates activity and should reasonably increase gradually from 6:00 to 9:00 (cortisol acrophase). From this time during the working day, until 17:00 hours, the recommended level of blue light should not be lower than 250 lux [7], but taking into account circadian physiology, its smooth increase to 500 lux during the daytime is reasonable for optimal alertness (12:00-14:00 hours, approximate melatonin bathypphase) with a further gradual decrease. After 17:00 hours, it is recommended to reduce the exposure of blue light below the optimal 250 lux until the above threshold levels are reached by the time melatonin synthesis begins.

For the prototype, we have adopted scientifically based standards for optimal Human Centric Lighting dynamics within 24 hours [7] - based on the actually obtained blue light, which most actively affects the melanopsin receptors of retinal ganglion cells. They conclude that “in the daytime, the recommended minimum level of melanopic light exposure to the eyes is 250 lux, measured in a vertical plane at a height of  $\approx 1.2$  m (i.e. vertical illumination at eye level, in a sitting position). If possible, daylight should be used first to match these levels. If additional electric lighting is required, polychromatic white light should ideally have a spectrum, like natural daylight, enriched with shorter wavelengths close to the peak of melanopsin sensitivity.

**Table S2.** Comparative analysis of blue light exposure averaged over 30-min epochs in Arctic residents with BMI < 25 vs BMI > 25 (n = 62).

| Time epoch | BMI < 25 (n = 41) |        |        | BMI >25 (n = 21) |        |        | BMI < 25<br>+95% CI<br>thresh-<br>old | BMI > 25<br>-95%CI<br>threshold |
|------------|-------------------|--------|--------|------------------|--------|--------|---------------------------------------|---------------------------------|
|            | Mean              | -0.95  | 0.95   | Mean             | -0.95  | 0.95   |                                       |                                 |
| 08:45      | 8.500             | 5.167  | 13.981 | 18.830           | 12.589 | 28.166 |                                       |                                 |
| 09:15      | 10.008            | 6.429  | 15.579 | 22.271           | 15.408 | 32.189 |                                       |                                 |
| 09:45      | 11.080            | 6.432  | 19.085 | 25.398           | 17.972 | 35.893 |                                       |                                 |
| 10:15      | 14.364            | 9.077  | 22.731 | 21.846           | 15.297 | 31.199 |                                       |                                 |
| 10:45      | 14.837            | 9.784  | 22.499 | 28.179           | 18.680 | 42.509 |                                       |                                 |
| 11:15      | 14.639            | 9.543  | 22.457 | 28.632           | 20.563 | 39.869 |                                       |                                 |
| 11:45      | 14.223            | 8.452  | 23.933 | 29.005           | 19.609 | 42.904 |                                       |                                 |
| 12:15      | 12.554            | 7.958  | 19.805 | 27.158           | 19.893 | 37.076 |                                       |                                 |
| 12:45      | 14.555            | 9.742  | 21.746 | 32.912           | 22.925 | 47.249 |                                       |                                 |
| 13:15      | 14.874            | 10.109 | 21.886 | 28.037           | 19.841 | 39.619 |                                       |                                 |
| 13:45      | 11.304            | 7.316  | 17.466 | 31.385           | 20.913 | 47.102 |                                       |                                 |
| 14:15      | 15.792            | 10.826 | 23.035 | 30.774           | 20.166 | 46.964 |                                       |                                 |
| 14:45      | 15.232            | 10.676 | 21.731 | 23.116           | 17.095 | 31.256 |                                       |                                 |
| 15:15      | 15.078            | 11.073 | 20.530 | 20.692           | 14.964 | 28.612 |                                       |                                 |
| 15:45      | 14.028            | 9.965  | 19.747 | 17.342           | 12.275 | 24.501 |                                       |                                 |
| 16:15      | 10.940            | 7.712  | 15.518 | 14.895           | 9.548  | 23.236 |                                       |                                 |
| 16:45      | 8.584             | 5.763  | 12.787 | 13.502           | 8.751  | 20.833 |                                       |                                 |
| 17:15      | 7.420             | 5.127  | 10.741 | 11.251           | 7.420  | 17.061 |                                       |                                 |
| 17:45      | 6.322             | 4.526  | 8.832  | 6.756            | 4.240  | 10.764 |                                       |                                 |
| 18:15      | 4.068             | 3.053  | 5.421  | 4.530            | 2.704  | 7.591  |                                       |                                 |
| 18:45      | 2.631             | 1.976  | 3.502  | 3.507            | 2.254  | 5.457  |                                       |                                 |
| 19:15      | 1.719             | 1.275  | 2.317  | 2.518            | 1.679  | 3.778  |                                       |                                 |
| 19:45      | 1.265             | 0.928  | 1.725  | 2.131            | 1.315  | 3.454  |                                       |                                 |
| 20:15      | 1.324             | 0.986  | 1.778  | 1.798            | 1.121  | 2.883  |                                       |                                 |
| 20:45      | 1.008             | 0.726  | 1.401  | 1.765            | 1.268  | 2.456  | <1.5                                  | <1.5                            |
| 21:15      | 0.514             | 0.263  | 1.003  | 1.647            | 1.160  | 2.338  | <1                                    | >1                              |
| 21:45      | 0.378             | 0.195  | 0.732  | 1.537            | 1.137  | 2.079  | <0.75                                 | >1                              |
| 22:15      | 0.179             | 0.070  | 0.460  | 1.158            | 0.752  | 1.784  | <0.5                                  | >0.75                           |
| 22:45      | 0.096             | 0.037  | 0.248  | 0.935            | 0.515  | 1.699  | <0.25                                 | >0.5                            |
| 23:15      | 0.026             | 0.009  | 0.077  | 0.500            | 0.228  | 1.096  | <0.1                                  | >0.2                            |
| 23:45      | 0.012             | 0.004  | 0.034  | 0.219            | 0.090  | 0.530  | <0.05                                 | >0.9                            |
| 00:15      | 0.003             | 0.001  | 0.009  | 0.042            | 0.011  | 0.170  | <0.01                                 | >0.01                           |
| 00:45      | 0.002             | 0.001  | 0.005  | 0.012            | 0.003  | 0.055  | 0                                     | 0                               |
| 01:15      | 0.001             | 0.000  | 0.002  | 0.003            | 0.001  | 0.015  | 0                                     | 0                               |
| 01:45      | 0.001             | 0.000  | 0.001  | 0.002            | 0.000  | 0.006  | 0                                     | 0                               |
| 02:15      | 0.000             | 0.000  | 0.001  | 0.001            | 0.000  | 0.005  | 0                                     | 0                               |
| 02:45      | 0.000             | 0.000  | 0.001  | 0.001            | 0.000  | 0.002  | 0                                     | 0                               |
| 03:15      | 0.000             | 0.000  | 0.001  | 0.000            | 0.000  | 0.002  | 0                                     | 0                               |
| 03:45      | 0.001             | 0.000  | 0.002  | 0.001            | 0.000  | 0.003  | 0                                     | 0                               |
| 04:15      | 0.000             | 0.000  | 0.001  | 0.001            | 0.000  | 0.004  | 0                                     | 0                               |
| 04:45      | 0.001             | 0.000  | 0.003  | 0.004            | 0.001  | 0.017  | 0                                     | 0                               |
| 05:15      | 0.008             | 0.003  | 0.021  | 0.013            | 0.003  | 0.051  |                                       |                                 |
| 05:45      | 0.042             | 0.017  | 0.105  | 0.054            | 0.019  | 0.154  |                                       |                                 |
| 06:15      | 0.167             | 0.066  | 0.424  | 0.314            | 0.157  | 0.631  |                                       |                                 |

|       |       |       |        |        |       |        |
|-------|-------|-------|--------|--------|-------|--------|
| 06:45 | 1.116 | 0.558 | 2.231  | 0.847  | 0.413 | 1.739  |
| 07:15 | 2.866 | 1.936 | 4.243  | 3.088  | 1.664 | 5.730  |
| 07:45 | 4.336 | 2.753 | 6.827  | 7.312  | 4.531 | 11.801 |
| 08:15 | 5.035 | 2.471 | 10.259 | 14.709 | 9.119 | 23.726 |

---

30-minute epochs of nocturnal excess when 95% confidence interval (CI) of the highest measured blue light exposure ( $\mu\text{W}/\text{cm}^2$ ) of BMI < 25 group does not overlap 95% CI of the lowest blue light exposure of BMI > 25 group are in **bold**. We show thresholds for epochs discriminating BMI groups in the right columns. **Suggested low threshold of nocturnal blue light exposure (20:30-05:00)** for optimal metabolic health is in **bold red** (BMI < 25 +95% CI threshold column).

**Table S3.** Actigraphy-derived characteristics depending on Body Mass Index (BMI) and MTNR1B G-allele in Arctic residents during spring equinox (n = 50).

| Variable                                                | MTNR1B genotype / BMI group |                      |                       |                     |
|---------------------------------------------------------|-----------------------------|----------------------|-----------------------|---------------------|
|                                                         | CC (n = 28)                 |                      | CG + GG (n = 22)      |                     |
|                                                         | BMI < 25 (n = 17)           | BMI > 25 (n = 11)    | BMI < 25 (n = 14)     | BMI > 25 (n = 8)    |
| <b>Activity, PIM</b>                                    |                             |                      |                       |                     |
| MESOR                                                   | 2438 ± 597                  | 2364 ± 534           | 2624 ± 468            | 2837 ± 1200         |
| 24-h A                                                  | 1737 ± 385                  | 1727 ± 473           | 1956 ± 474            | 1998 ± 823          |
| Phase                                                   | 14:27 ± 1:37                | 15:02 ± 1:02         | 15:17 ± 0:53          | 14:19 ± 1:17        |
| M10                                                     | 3877 ± 854                  | 3876 ± 834           | 4221 ± 784            | 4594 ± 1955         |
| M10 Onset                                               | 8:31 ± 1:22                 | 8:59 ± 1:03          | 9:47 ± 1:06           | 8:35 ± 1:27         |
| L5                                                      | 245 ± 235                   | 175 ± 106            | 272 ± 228             | 222 ± 290           |
| L5 Onset                                                | 1:45 ± 1:14                 | 1:39 ± 1:10          | 1:39 ± 1:12           | 1:10 ± 0:48         |
| IV                                                      | 0.890 ± 0.182               | 0.798 ± 0.126        | 0.865 ± 0.164         | 0.817 ± 0.162       |
| IS                                                      | 0.543 ± 0.104               | 0.535 ± 0.103        | 0.569 ± 0.118         | 0.508 ± 0.045       |
| RA                                                      | 0.870 ± 0.073               | 0.888 ± 0.051        | 0.888 ± 0.056         | 0.849 ± 0.093       |
| CFI                                                     | 0.660 ± 0.052               | 0.677 ± 0.043        | 0.682 ± 0.068         | 0.660 ± 0.044       |
| <b>Wrist temperature</b>                                |                             |                      |                       |                     |
| MESOR                                                   | <b>31.83 ± 0.36**</b>       | <b>31.74 ± 0.37*</b> | <b>31.88 ± 0.46**</b> | <b>31.10 ± 0.64</b> |
| 24-h A                                                  | 1.48 ± 0.55                 | 1.28 ± 0.47          | 1.56 ± 0.49           | 1.30 ± 0.75         |
| Phase                                                   | 2:30 ± 1:32                 | 2:21 ± 1:34          | 3:35:0:59             | 2:18 ± 2:16         |
| <b>Sleep characteristics</b>                            |                             |                      |                       |                     |
| Bedtime                                                 | 22:42 ± 1:02                | 22:50 ± 1:08         | 22:41 ± 0:57          | 22:45 ± 1:30        |
| Wake time                                               | 6:51 ± 1:08                 | 7:14 ± 1:28          | 6:53 ± 0:52           | 6:59 ± 2:37         |
| Sleep phase                                             | 2:47 ± 1:00                 | 3:02 ± 1:07          | 2:47 ± 0:50           | 2:46 ± 1:44         |
| Time in bed                                             | 8:07 ± 0:49                 | 8:24 ± 1:23          | 8:12 ± 0:43           | 8:13 ± 2:29         |
| Total sleep                                             | 7:13 ± 0:43                 | 7:17 ± 1:23          | 7:15 ± 0:32           | 7:20 ± 2:25         |
| Sleep latency, min                                      | 2.04 ± 1.20                 | 3.10 ± 2.92          | 2.50 ± 2.02           | 3.23 ± 2.33         |
| Sleep efficiency, %                                     | 88.64 ± 3.82                | 85.62 ± 7.42         | 87.68 ± 4.76          | 87.38 ± 5.95        |
| WASO                                                    | 0:50 ± 0:19                 | 1:00 ± 0:31          | 0:53 ± 0:25           | 0:48 ± 0:26         |
| <b>Blue light, <math>\mu\text{w}/\text{cm}^2</math></b> |                             |                      |                       |                     |
| MESOR                                                   | 11.07 ± 8.67                | 15.38 ± 9.40         | 9.90 ± 4.97           | 12.98 ± 4.33        |
| 24-h A                                                  | 15.04 ± 11.05               | 23.14 ± 15.74        | 14.71 ± 7.41          | 18.41 ± 6.01        |
| Phase                                                   | 12:35 ± 0:44                | 13:01 ± 0:50         | 13:09 ± 0:40          | 12:45 ± 0:50        |
| M10                                                     | 20.67 ± 12.27               | 33.71 ± 22.78        | 21.60 ± 10.60         | 28.29 ± 10.24       |
| M10 Onset                                               | 7:36 ± 0:46                 | 8:02 ± 0:25          | 8:09 ± 0:46           | 7:38 ± 0:52         |
| L5                                                      | 0.10 ± 0.20                 | 0.07 ± 0.16          | 0.06 ± 0.10           | 0.06 ± 0.10         |
| L5 Onset                                                | 1:37 ± 2:21                 | 1:12 ± 1:20          | 1:10 ± 1:21           | 1:45 ± 2:45         |
| L5 log <sub>10</sub>                                    | -1.99 ± 1.24                | -2.13 ± 1.09         | -2.35 ± 1.33          | -2.09 ± 1.21        |
| IV                                                      | 0.909 ± 0.243               | 0.980 ± 0.333        | 0.960 ± 0.415         | 0.862 ± 0.341       |
| IS                                                      | 0.348 ± 0.116               | 0.416 ± 0.164        | 0.416 ± 0.143         | 0.373 ± 0.159       |
| RA                                                      | 0.979 ± 0.031               | 0.989 ± 0.015        | 0.992 ± 0.011         | 0.980 ± 0.021       |
| DDI <sub>bl</sub>                                       | 341 ± 119                   | 275 ± 144            | 355 ± 90              | 300 ± 82            |
| NEI <sub>bl</sub>                                       | 2.34 ± 1.82                 | 2.62 ± 1.45          | <b>1.27 ± 1.11 *</b>  | <b>4.38 ± 4.13</b>  |

All values in the groups are mean ± SD. 24 h A – 24-hour Amplitude; M10 -average value of 10 hours of greatest activity or blue light exposure; L5 – 5 hours of lowest activity or blue light exposure; IV – intra-daily variability; IS – inter-daily stability; RA – relative amplitude; DDI<sub>bl</sub> – daylight deficiency index; NEI<sub>bl</sub> – nocturnal excess index; CFI – circadian function index; Phases, Onset time are indicated in hh:mm; DDI<sub>bl</sub> and NEI<sub>bl</sub> in  $\mu\text{w}/\text{cm}^2 \cdot \text{hour}$ ; significant differences between the groups, Mann-Whitney U test are in **bold**. \*  $p < 0.05$ ; \*\*  $p < 0.01$ . vs. G-allele carriers of BMI > 25 group.

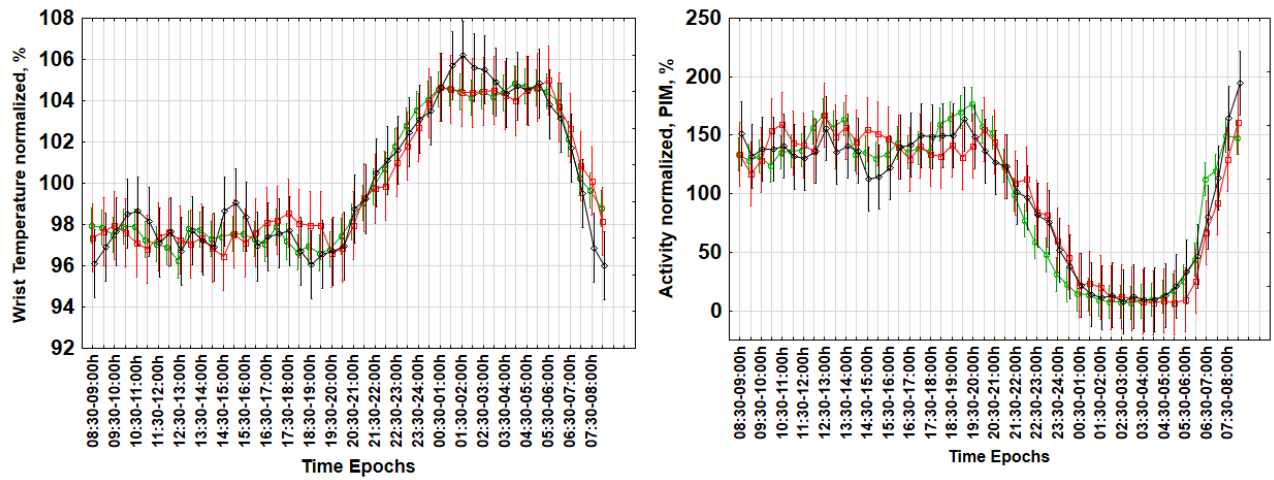

**Figure S1.** Similar amplitude and phase of wrist temperature and motor activity in Arctic residents with different body mass index (BMI). Vertical bars denote 95% confidence intervals. ANOVA for Time\*group interaction; wrist temperature,  $F_{(94, 2880)} = 0.727$ ,  $p = 0.977$ ; motor activity =  $F_{(94, 2880)} = 1.128$ ,  $p = 0.192$ . Normalized wrist temperature and activity in 30-minute time windows in groups with different BMI. green lines BMI <25; red lines BMI >25; black lines BMI >30.
